# Supplementary material for: A noteworthy case of rewilding Chinese yew from a garden population in eastern China
Source: PeerJ. 2021 Oct 19;9:e12341. doi: 10.7717/peerj.12341 (PMC8532990; doi:10.7717/peerj.12341)
Supplement: Supplemental Information 1 — Raw data of parent yews, yews in CB forest, and yews in DB forest respectively. These data were used for statistical analysis to compare CB forest and DB forest. [file peerj-09-12341-s001.xlsx]

## Sheet: Raw data of parent yews
Raw data of parent yews in Nanjing Botanical Garden (NBG)
Serial number	Diameter at breast height（cm）	Height（m）	First branch height（m）	GPS	Altitude (m)	Gender
1	35.0318	10.3	1.93	32°03′31.15 "N, 118°49′37.79 "E	28.4	Female
2	23.5669	10.5	2.57	32°03′31.99 "N, 118°49′38.53 "E	31.3	Female
3	36.5287	11.2	1.38	32°03′32.19 "N, 118°49′38.49 "E	30.7	Female
4	35.6688	10.15	1.9	32°03′32.29 "N, 118°49′38.76 "E	30.1	Male
5	20.8599	8	2.97	32°03′32.39 "N, 118°49′38.80 "E	32.6	Male
6	30.8917	11.3	2.22	32°03′32.35 "N, 118°49′38.88 "E	33	Male
7	27.3885	10.3	2.6	32°03′32.46 "N, 118°49′38.96 "E	34.1	Male
8	26.4331	11.5	2.2	32°03′32.46"N, 118°49′38.92 "E	34.2	Male

## Sheet: Raw data of yews in CB forest
Three transects of raw data of Chinese yews in coniferous-broadleaved mixed forest
Transect-quadrat	Species	Diameter at breast height（cm）	Height（m）	First branch height（m）	Type of sprouting	Total yews in the sample plot
1—1	Taxus wallichiana var. mairei	1.5	1	0.2		7
	Taxus wallichiana var. mairei	3.5	3.1	1.4
	Taxus wallichiana var. mairei	4.8	3.1	1.9
	Sprouting1	1	0.97	0.5	Collar sprouts
	Taxus wallichiana var. mairei	9.23567	6.3	0.95
	Taxus wallichiana var. mairei	7.00637	6.3	1.7
	Taxus wallichiana var. mairei	6.36943	6.2	3.8
1—2	Taxus wallichiana var. mairei	7	4.7	0.95		22
	Taxus wallichiana var. mairei	7.16561	4.3	0.4
	Taxus wallichiana var. mairei	1.6	1.7	0.8
	Taxus wallichiana var. mairei	10.5096	7.5	1.9
	Taxus wallichiana var. mairei	2.6	4.2	2
	Taxus wallichiana var. mairei	2.1	4	2.05
	Taxus wallichiana var. mairei	2	2.1	0.9
	Taxus wallichiana var. mairei	4.3	3.8	1.05
	Sprouting1	1.7	1.5	0.8	Collar sprouts
	Taxus wallichiana var. mairei	2.5	2	0.56
	Sprouting1	0.3	0.5	0.24	Collar sprouts
	Taxus wallichiana var. mairei	3.3	3.9	1.1
	Taxus wallichiana var. mairei	3.5	3.8	1.8
	Taxus wallichiana var. mairei	7.96178	6.1	0.8
	Sprouting1	0.3	0.7	0.1	Collar sprouts1
	Sprouting2	0.15	0.48	0.25	Collar sprouts2
	Sprouting3	0.2	0.54	0.1	Collar sprouts3
	Sprouting4	0.25	0.53	0.2	Collar sprouts4
	Taxus wallichiana var. mairei	5.57325	5	1.9
	Sprouting1	1.2	1.8	1.3	Collar sprouts
	Taxus wallichiana var. mairei	5.25478	4.3	1.8
	Taxus wallichiana var. mairei	8.08917	6.3	2.2
1—3	Taxus wallichiana var. mairei	5.09554	4.3	2.4		4
	Taxus wallichiana var. mairei	6.36943	5.2	2.15
	Sprouting1	0.2	0.5	0.14	Collar sprouts
	Taxus wallichiana var. mairei	0.8	1	0.2
1—4	Taxus wallichiana var. mairei	7.73885	6.5	2.5		36
	Sprouting1	0.5	0.95	0.12	Collar sprouts
	Taxus wallichiana var. mairei	1.6	1.7	0.2
	Taxus wallichiana var. mairei	4	3.85	2
	Sprouting1	0.3	0.8	0.3	Collar sprouts
	Taxus wallichiana var. mairei	2.3	3.1	2.3
	Sprouting1	1.8	1.4	0.75	Collar sprouts1
	Sprouting2	0.8	1.1	0.7	Collar sprouts2
	Taxus wallichiana var. mairei	4.96815	4.4	3.5
	Sprouting1	2.1	2.5	1.2	Collar sprouts
	Taxus wallichiana var. mairei	3.3	4	2
	Taxus wallichiana var. mairei	0.4	0.72	0.3
	Taxus wallichiana var. mairei	1.6	1.7	0.65
	Taxus wallichiana var. mairei	6.52866	5.6	3.1
	Taxus wallichiana var. mairei	2.6	1.4	0.96
	Sprouting1	0.3	0.52	0.11	Collar sprouts
	Taxus wallichiana var. mairei	2.5	2.3	1.12
	Taxus wallichiana var. mairei	1.8	1.65	0.96
	Taxus wallichiana var. mairei	3.8	3.7	1.4
	Taxus wallichiana var. mairei	2.4	1.7	0.8
	Taxus wallichiana var. mairei	2	1.9	0.6
	Taxus wallichiana var. mairei	7.00637	2.4	1.1
	Taxus wallichiana var. mairei	0.8	1.2	0.45
	Sprouting1	0.8	0.7	0.3	Collar sprouts
	Taxus wallichiana var. mairei	0.4	0.6	0.2
	Taxus wallichiana var. mairei	7.16561	7	1.4
	Taxus wallichiana var. mairei	2	2.5	1.6
	Taxus wallichiana var. mairei	4.5	4	1.1
	Sprouting1	0.4	1.3	0.38	Collar sprouts1
	Sprouting2	1.5	1.22	0.46	Collar sprouts2
	Taxus wallichiana var. mairei	3.3	4	1.45
	Taxus wallichiana var. mairei	2.5	3.6	1.4
	Taxus wallichiana var. mairei	3	3.1	1.1
	Taxus wallichiana var. mairei	6.36943	5.2	2.15
	Taxus wallichiana var. mairei	0.4	0.8	0.25
	Taxus wallichiana var. mairei	0.1	0.17	0.08
1—5	Taxus wallichiana var. mairei	3.4	3	1.7		12
	Taxus wallichiana var. mairei	2.2	3.1	1
	Taxus wallichiana var. mairei	8.5	6.2	2.85
	Sprouting1	2.4	3.2	1.3	Collar sprouts
	Sprouting2	1.5	1.7	0.77	Collar sprouts
	Taxus wallichiana var. mairei	5	3.9	0.7
	Taxus wallichiana var. mairei	3.1	2.6	1.15
	Taxus wallichiana var. mairei	1.9	2.1	0.95
	Taxus wallichiana var. mairei	6	4.3	2.2
	Taxus wallichiana var. mairei	5.8	4	2.5
	Taxus wallichiana var. mairei	0.15	0.32	0.15
	Taxus wallichiana var. mairei	2	2.5	0.92
1—6	Taxus wallichiana var. mairei	3.2	2.5	2.1		3
	Taxus wallichiana var. mairei	1.7	2.3	0.6
	Taxus wallichiana var. mairei	1.4	1.6	0.57
1— 7	Taxus wallichiana var. mairei	2.6	3.1	1.7		6
	Taxus wallichiana var. mairei	2.4	2.7	1.2
	Taxus wallichiana var. mairei	8.4	6.7	0.6
	Taxus wallichiana var. mairei	0.3	0.75	0.3
	Taxus wallichiana var. mairei	2.6	2.4	1.8
	Taxus wallichiana var. mairei	4.3	3.4	2.2
1—8	Taxus wallichiana var. mairei	2	1.15	0.3		1
1—9	Taxus wallichiana var. mairei	1.6	2.1	1.6		2
	Taxus wallichiana var. mairei	4	3	1.3
1—10	Taxus wallichiana var. mairei	3.6	3.1	0.7		2
	Taxus wallichiana var. mairei	1	1.9	0.75
1—11	Taxus wallichiana var. mairei	4.1	4.1	1.7		5
	Taxus wallichiana var. mairei	1.1	1.1	0.34
	Sprouting1	1.1	1.1	0.5	Collar sprouts
	Taxus wallichiana var. mairei	1.1	0.98	0.3
	Taxus wallichiana var. mairei	3.2	3	0.25
1—12	Taxus wallichiana var. mairei	1.5	1	0.2		7
	Taxus wallichiana var. mairei	3.5	3.1	1.4
	Taxus wallichiana var. mairei	4.8	3.1	1.9
	Sprouting1	1	0.97	0.5	Collar sprouts
	Taxus wallichiana var. mairei	9.23567	6.3	0.95
	Taxus wallichiana var. mairei	7.00637	6.3	1.7
	Taxus wallichiana var. mairei	6.36943	6.2	3.8
1—13	Taxus wallichiana var. mairei	7	4.7	0.95		22
	Taxus wallichiana var. mairei	7.16561	4.3	0.4
	Taxus wallichiana var. mairei	1.6	1.7	0.8
	Taxus wallichiana var. mairei	10.5096	7.5	1.9
	Taxus wallichiana var. mairei	2.6	4.2	2
	Taxus wallichiana var. mairei	2.1	4	2.05
	Taxus wallichiana var. mairei	2	2.1	0.9
	Taxus wallichiana var. mairei	4.3	3.8	1.05
	Sprouting1	1.7	1.5	0.8	Collar sprouts
	Taxus wallichiana var. mairei	2.5	2	0.56
	Sprouting1	0.3	0.5	0.24	Collar sprouts
	Taxus wallichiana var. mairei	3.3	3.9	1.1
	Taxus wallichiana var. mairei	3.5	3.8	1.8
	Taxus wallichiana var. mairei	7.96178	6.1	0.8
	Sprouting1	0.3	0.7	0.1	Collar sprouts1
	Sprouting2	0.15	0.48	0.25	Collar sprouts2
	Sprouting3	0.2	0.54	0.1	Collar sprouts3
	Sprouting4	0.25	0.53	0.2	Collar sprouts4
	Taxus wallichiana var. mairei	5.57325	5	1.9
	Sprouting1	1.2	1.8	1.3	Collar sprouts
	Taxus wallichiana var. mairei	5.25478	4.3	1.8
	Taxus wallichiana var. mairei	8.08917	6.3	2.2
1—14	Taxus wallichiana var. mairei	5.09554	4.3	2.4		4
	Taxus wallichiana var. mairei	6.36943	5.2	2.15
	Sprouting1	0.2	0.5	0.14	Collar sprouts
	Taxus wallichiana var. mairei	0.8	1	0.2
1—15	Taxus wallichiana var. mairei	7.73885	6.5	2.5		36
	Sprouting1	0.5	0.95	0.12	Collar sprouts
	Taxus wallichiana var. mairei	1.6	1.7	0.2
	Taxus wallichiana var. mairei	4	3.85	2
	Sprouting1	0.3	0.8	0.3	Collar sprouts
	Taxus wallichiana var. mairei	2.3	3.1	2.3
	Sprouting1	1.8	1.4	0.75	Collar sprouts1
	Sprouting2	0.8	1.1	0.7	Collar sprouts2
	Taxus wallichiana var. mairei	4.96815	4.4	3.5
	Sprouting1	2.1	2.5	1.2	Collar sprouts
	Taxus wallichiana var. mairei	3.3	4	2
	Taxus wallichiana var. mairei	0.4	0.72	0.3
	Taxus wallichiana var. mairei	1.6	1.7	0.65
	Taxus wallichiana var. mairei	6.52866	5.6	3.1
	Taxus wallichiana var. mairei	2.6	1.4	0.96
	Sprouting1	0.3	0.52	0.11	Collar sprouts
	Taxus wallichiana var. mairei	2.5	2.3	1.12
	Taxus wallichiana var. mairei	1.8	1.65	0.96
	Taxus wallichiana var. mairei	3.8	3.7	1.4
	Taxus wallichiana var. mairei	2.4	1.7	0.8
	Taxus wallichiana var. mairei	2	1.9	0.6
	Taxus wallichiana var. mairei	7.00637	2.4	1.1
	Taxus wallichiana var. mairei	0.8	1.2	0.45
	Sprouting1	0.8	0.7	0.3	Collar sprouts
	Taxus wallichiana var. mairei	0.4	0.6	0.2
	Taxus wallichiana var. mairei	7.16561	7	1.4
	Taxus wallichiana var. mairei	2	2.5	1.6
	Taxus wallichiana var. mairei	4.5	4	1.1
	Sprouting1	0.4	1.3	0.38	Collar sprouts1
	Sprouting2	1.5	1.22	0.46	Collar sprouts2
	Taxus wallichiana var. mairei	3.3	4	1.45
	Taxus wallichiana var. mairei	2.5	3.6	1.4
	Taxus wallichiana var. mairei	3	3.1	1.1
	Taxus wallichiana var. mairei	6.36943	5.2	2.15
	Taxus wallichiana var. mairei	0.4	0.8	0.25
	Taxus wallichiana var. mairei	0.1	0.17	0.08
1—16	Taxus wallichiana var. mairei	1.5	1	0.2		7
	Taxus wallichiana var. mairei	3.5	3.1	1.4
	Taxus wallichiana var. mairei	4.8	3.1	1.9
	Sprouting1	1	0.97	0.5	Collar sprouts
	Taxus wallichiana var. mairei	9.23567	6.3	0.95
	Taxus wallichiana var. mairei	7.00637	6.3	1.7
	Taxus wallichiana var. mairei	6.36943	6.2	3.8
2—1	Taxus wallichiana var. mairei	3.2	3.4	1.6		6
	Taxus wallichiana var. mairei	2.8	2.9	1.7
	Taxus wallichiana var. mairei	2.1	2.7	0.6
	Taxus wallichiana var. mairei	4.6	5.2	1.7
	Taxus wallichiana var. mairei	4.6	4.8	0.7
	Sprouting1	3.2	3.6	1.8	Collar sprouts
2—2	Taxus wallichiana var. mairei	6.21019	5.8	1.6		7
	Taxus wallichiana var. mairei	2.6	2.8	1.4
	Sprouting1	1.9	1.9	0.7	Collar sprouts
	Taxus wallichiana var. mairei	2.2	2.9	1.03
	Sprouting1	0.7	1.14	0.4	Collar sprouts
	Taxus wallichiana var. mairei	1.9	2.3	1.6
	Taxus wallichiana var. mairei	1.3	0.84	0.4
2—3	Taxus wallichiana var. mairei	3.1	2.9	1.7		5
	Taxus wallichiana var. mairei	2.7	2.5	0.9
	Sprouting1	2.5	2.7	1.6	Collar sprouts
	Taxus wallichiana var. mairei	1.9	1.28	0.7
	Taxus wallichiana var. mairei	6.2	5.8	1.5
2—4	Taxus wallichiana var. mairei	1.3	1.02	0.3		2
	Taxus wallichiana var. mairei	3.2	3.3	2.5
2—5	Taxus wallichiana var. mairei	6.6	5.7	2.16		9
	Sprouting1	2.5	3.7	2.21	Collar sprouts
	Taxus wallichiana var. mairei	2.3	2.5	1.6
	Taxus wallichiana var. mairei	2.5	2.7	1.58
	Taxus wallichiana var. mairei	5.8	5.3	2.7
	Sprouting1	3.3	2.9	2.5	Collar sprouts
	Sprouting2	4.4	4.3	2.8	Collar sprouts
	Taxus wallichiana var. mairei	5.6	6.2	1.6
	Taxus wallichiana var. mairei	3.6	4.6	1.5
2—6	Taxus wallichiana var. mairei	4.6	4	1.7		14
	Taxus wallichiana var. mairei	5.7	6.8	1.4
	Taxus wallichiana var. mairei	8.7	7.1	1.18
	Taxus wallichiana var. mairei	3.7	4.3	1.5
	Taxus wallichiana var. mairei	5.4	6.7	2.8
	Taxus wallichiana var. mairei	3.4	2.7	1.6
	Taxus wallichiana var. mairei	4.7	3.6	2.1
	Taxus wallichiana var. mairei	9.7	8.5	2.3
	Taxus wallichiana var. mairei	5.41401	5.2	1.3
	Taxus wallichiana var. mairei	6.5	6.1	2.4
	Taxus wallichiana var. mairei	2.3	1.8	0.9
	Taxus wallichiana var. mairei	3.7	3.4	2.7
	Taxus wallichiana var. mairei	0.9	1.2	0.6
	Taxus wallichiana var. mairei	3.7	3.6	2.9
2—7	Taxus wallichiana var. mairei	7.32484	8	3.5		12
	Taxus wallichiana var. mairei	3	3.8	3
	Taxus wallichiana var. mairei	1.5	2	1.7
	Taxus wallichiana var. mairei	2.6	3.8	0.8
	Taxus wallichiana var. mairei	3.6	3.7	0.92
	Sprouting1	1.5	1.4	1.15	Collar sprouts
	Taxus wallichiana var. mairei	0.6	0.9	0.5
	Taxus wallichiana var. mairei	3.4	3.1	2
	Taxus wallichiana var. mairei	2.2	2.5	1.3
	Sprouting1	1.2	1.8	0.48
	Sprouting2	0.4	0.7	0.28	Collar sprouts
	Taxus wallichiana var. mairei	3.55	7.7	4.9
2—8	Taxus wallichiana var. mairei	3.6	3.1	1.06		18
	Taxus wallichiana var. mairei	3.2	3.7	2.1
	Taxus wallichiana var. mairei	4.4	4.6	2.8
	Taxus wallichiana var. mairei	8.9172	6.8	1.5
	Taxus wallichiana var. mairei	6.5	6.4	3.7
	Taxus wallichiana var. mairei	5.3	5	2.5
	Taxus wallichiana var. mairei	6.7	5.8	2.3
	Taxus wallichiana var. mairei	0.2	0.5	0.2
	Taxus wallichiana var. mairei	0.3	0.7	0.3
	Taxus wallichiana var. mairei	4.2	5.8	2.4
	Taxus wallichiana var. mairei	2	2.7	1.4
	Taxus wallichiana var. mairei	5.2	4.6	2.2
	Taxus wallichiana var. mairei	2.2	2.8	2.4
	Taxus wallichiana var. mairei	2.4	2.8	1.1
	Taxus wallichiana var. mairei	5.4	4.5	2.4
	Taxus wallichiana var. mairei	3.2	2.9	1.6
	Taxus wallichiana var. mairei	4.7	4.1	2.6
	Taxus wallichiana var. mairei	4	3	1.4
2—9	Taxus wallichiana var. mairei	4	3.1	1.1		13
	Taxus wallichiana var. mairei	3	2.1	1.5
	Taxus wallichiana var. mairei	2.5	2.3	1.4
	Sprouting1	0.3	0.7	0.3	Collar sprouts1
	Sprouting2	1.2	1.6	0.53	Collar sprouts2
	Taxus wallichiana var. mairei	4.4	3.2	0.7
	Taxus wallichiana var. mairei	5.73248	5	1.6
	Sprouting1	1.4	1.6	1.3	Collar sprouts1
	Taxus wallichiana var. mairei	4	4.2	2.6
	Taxus wallichiana var. mairei	5.57325	4.1	1.05
	Taxus wallichiana var. mairei	1.5	1.8	0.22
	Taxus wallichiana var. mairei	4.5	3.2	0.7
	Taxus wallichiana var. mairei	3.5	2.6	1.7
2—10	Taxus wallichiana var. mairei	2.3	3.1	1.6		2
	Sprouting1	2	1.6	1	Collar sprouts
2—11	Taxus wallichiana var. mairei	1.2	1	0.5		5
	Taxus wallichiana var. mairei	6.2	5.7	2.6
	Taxus wallichiana var. mairei	3.1	3.5	1.5
	Sprouting1	1.3	2.3	0.9	Opportunistic sprouts 1
	Sprouting2	0.9	1.4	0.6	Opportunistic sprouts 2
2—12	Taxus wallichiana var. mairei	3.2	3.4	1.6		6
	Taxus wallichiana var. mairei	2.8	2.9	1.7
	Taxus wallichiana var. mairei	2.1	2.7	0.6
	Taxus wallichiana var. mairei	4.6	5.2	1.7
	Taxus wallichiana var. mairei	4.6	4.8	0.7
	Sprouting1	3.2	3.6	1.8	Collar sprouts
2—13	Taxus wallichiana var. mairei	6.21019	5.8	1.6		7
	Taxus wallichiana var. mairei	2.6	2.8	1.4
	Sprouting1	1.9	1.9	0.7	Collar sprouts
	Taxus wallichiana var. mairei	2.2	2.9	1.03
	Sprouting1	0.7	1.14	0.4	Collar sprouts
	Taxus wallichiana var. mairei	1.9	2.3	1.6
	Taxus wallichiana var. mairei	1.3	0.84	0.4
2—14	Taxus wallichiana var. mairei	3.1	2.9	1.7		5
	Taxus wallichiana var. mairei	2.7	2.5	0.9
	Sprouting1	2.5	2.7	1.6	Collar sprouts
	Taxus wallichiana var. mairei	1.9	1.28	0.7
	Taxus wallichiana var. mairei	6.2	5.8	1.6
2—15	Taxus wallichiana var. mairei	1.3	1.02	0.3		2
	Taxus wallichiana var. mairei	3.2	3.3	2.5
2—16	Taxus wallichiana var. mairei	3.2	3.4	1.6		6
	Taxus wallichiana var. mairei	2.8	2.9	1.7
	Taxus wallichiana var. mairei	2.1	2.7	0.6
	Taxus wallichiana var. mairei	4.6	5.2	1.7
	Taxus wallichiana var. mairei	4.6	4.8	0.7
	Sprouting1	3.2	3.6	1.8	Collar sprouts
3—1	None					0
3—2	Taxus wallichiana var. mairei	3.6	2.8	1.1		3
	Sprouting1	1.7	1.5	0.8	Collar sprouts1
	Sprouting2	0.7	1.1	0.4	Collar sprouts2
3—3	Taxus wallichiana var. mairei	2.4	2.5	1		6
	Taxus wallichiana var. mairei	2	2.5	0.5
	Taxus wallichiana var. mairei	7.8	6.2	2.05
	Sprouting1	1.7	1.7	0.6	Collar sprouts1
	Sprouting2	1	1.15	0.4	Collar sprouts2
	Sprouting3	0.8	1.7	0.7	Collar sprouts3
3—4	Taxus wallichiana var. mairei	4	3.6	1.1		1
3—5	Taxus wallichiana var. mairei	6.05096	4.3	0.56		10
	Sprouting1	0.3	0.4	0.15	Collar sprouts1
	Sprouting2	0.3	0.38	0.2	Collar sprouts2
	Sprouting3	0.4	0.63	0.25	Collar sprouts3
	Taxus wallichiana var. mairei	0.25	0.2	0.08
	Taxus wallichiana var. mairei	5	4	1.8
	Taxus wallichiana var. mairei	5.92357	2.6	0.95
	Sprouting1	1.3	1.1	0.6	Collar sprouts
	Taxus wallichiana var. mairei	3.3	3.5	2.05
	Taxus wallichiana var. mairei	10.3503	7.1	3
3—6	Taxus wallichiana var. mairei	5.98726	4.4	1.15		5
	Taxus wallichiana var. mairei	4	4.3	3.2
	Taxus wallichiana var. mairei	6.36943	5.5	2.6
	Taxus wallichiana var. mairei	4.6	3.8	1.4
	Taxus wallichiana var. mairei	4	4	2.6
3—7	Taxus wallichiana var. mairei	2.3	3.1	1.6		1
3—8	None					0
3—9	None					0
3—10	None					0
3—11	Taxus wallichiana var. mairei	0.4	0.26	0.1		4
	Taxus wallichiana var. mairei	0.2	0.14	0.07
	Taxus wallichiana var. mairei	0.1	0.08	0.04
	Taxus wallichiana var. mairei	0.2	0.25	0.12
3—12	None					0
3—13	Taxus wallichiana var. mairei	3.6	2.8	1.1		3
	Taxus wallichiana var. mairei	1.7	1.5	0.8	Collar sprouts1
	Taxus wallichiana var. mairei	0.7	1.1	0.4	Collar sprouts2
3—14	Taxus wallichiana var. mairei	2.4	2.5	1		6
	Taxus wallichiana var. mairei	2	2.5	0.5
	Taxus wallichiana var. mairei	7.8	6.2	2.05
	Taxus wallichiana var. mairei	1.7	1.7	0.6	Collar sprouts1
	Taxus wallichiana var. mairei	1	1.15	0.4	Collar sprouts2
	Taxus wallichiana var. mairei	0.8	1.7	0.7	Collar sprouts3
3—15	Taxus wallichiana var. mairei	4	3.6	1.1		1
3—16	None					0
Chinese yews outside the three transects in coniferous-broadleaved mixed forest
Species	Diameter at breast height（cm）	Height（m）	First branch height（m）	Type of sprouting
Taxus wallichiana var. mairei	0.1	0.18	0.08
Taxus wallichiana var. mairei	0.3	0.62	0.3
Taxus wallichiana var. mairei	5.5	5.8	2.7
Taxus wallichiana var. mairei	1.4	1.5	0.26
Taxus wallichiana var. mairei	0.6	0.98	0.24
Taxus wallichiana var. mairei	7.64331	6.3	1.2
Taxus wallichiana var. mairei	1.6	1.9	0.7
Taxus wallichiana var. mairei	0.2	0.3	0.15
Taxus wallichiana var. mairei	6.5	7.1	1.3
Taxus wallichiana var. mairei	6.36943	5.8	2.3
Sprouting1	6.6879	4.3	1.1	Collar sprouts
Taxus wallichiana var. mairei	0.9	1.16	0.54
Taxus wallichiana var. mairei	2.4	2.9	1.7
Taxus wallichiana var. mairei	1.6	1.9	1.1
Taxus wallichiana var. mairei	2.4	1.9	0.6
Taxus wallichiana var. mairei	0.6	0.9	0.3
Taxus wallichiana var. mairei	3.2	3.5	1.7
Taxus wallichiana var. mairei	0.1	1.6	0.6
Taxus wallichiana var. mairei	0.6	0.7	0.2
Taxus wallichiana var. mairei	0.6	0.7	0.2
Taxus wallichiana var. mairei	0.1	0.2	0.1
Taxus wallichiana var. mairei	1.3	2.1	1.3
Taxus wallichiana var. mairei	2.7	2.82	1.4
Taxus wallichiana var. mairei	1.9	2.1	1.53
Taxus wallichiana var. mairei	0.7	0.9	0.5	Collar sprouts
Taxus wallichiana var. mairei	2.1	1.15	0.3
Taxus wallichiana var. mairei	8.28025	6.2	0.55
Taxus wallichiana var. mairei	0.1	0.18	0.05
Taxus wallichiana var. mairei	0.3	0.62	0.15
Taxus wallichiana var. mairei	5.5	5.8	2.7
Taxus wallichiana var. mairei	1.4	1.5	0.26
Taxus wallichiana var. mairei	0.6	0.98	0.24
Taxus wallichiana var. mairei	7.64331	6.3	1.2
Taxus wallichiana var. mairei	1.6	1.9	0.7
Taxus wallichiana var. mairei	1.2	2.1	0.9
Taxus wallichiana var. mairei	0.1	0.8	0.1
Taxus wallichiana var. mairei	4.6	3.6	0.55
Taxus wallichiana var. mairei	4	4.3	2.6
Sprouting1	1.2	2.1	0.65	Collar sprouts
Taxus wallichiana var. mairei	4.1	2.7	1.14
Taxus wallichiana var. mairei	4.3	3	0.6
Taxus wallichiana var. mairei	1.1	1.1	0.3
Taxus wallichiana var. mairei	2	2.2	0.5
Taxus wallichiana var. mairei	0.2	0.4	0.2
Taxus wallichiana var. mairei	0.3	0.6	0.3
Taxus wallichiana var. mairei	0.1	0.2	0.1
Taxus wallichiana var. mairei	1.1	1.3	0.3
Taxus wallichiana var. mairei	2	1.8	0.6
Taxus wallichiana var. mairei	0.4	1.1	0.2
Taxus wallichiana var. mairei	1.1	1.1	0.4
Taxus wallichiana var. mairei	0.8	1.2	0.51
Taxus wallichiana var. mairei	3.5	3.7	1.4
Taxus wallichiana var. mairei	1.4	0.92	0.4
Taxus wallichiana var. mairei	6.84713	7.1	2.2
Taxus wallichiana var. mairei	3.2	3.2	0.9
Taxus wallichiana var. mairei	12.293	6.6	5.1
Taxus wallichiana var. mairei	8.59873	8.2	5.2
Taxus wallichiana var. mairei	0.8	1.2	0.4
Taxus wallichiana var. mairei	2.5	2.7	1.6
Sprouting1	2	2.4	1.7	Root sprouts 1
Sprouting2	0.6	1.1	0.4	Root sprouts 2
Taxus wallichiana var. mairei	7.83439	6.8	3.4
Taxus wallichiana var. mairei	4.84076	4.1	1.2
Taxus wallichiana var. mairei	3.40764	4.1	1.2
Taxus wallichiana var. mairei	1.3	2.2	0.9
Taxus wallichiana var. mairei	1.6	2.1	1.2
Taxus wallichiana var. mairei	0.5	0.83	0.4
Taxus wallichiana var. mairei	0.3	0.7	0.3
Taxus wallichiana var. mairei	0.4	0.8	0.35
Taxus wallichiana var. mairei	0.7	1.3	0.6
Taxus wallichiana var. mairei	2.4	1.2	0.6
Taxus wallichiana var. mairei	1.2	1.8	1.6
Taxus wallichiana var. mairei	2.3	2.5	0.7
Taxus wallichiana var. mairei	6.05096	5.4	3.2
Sprouting1	2.4	3.5	0.9	Collar sprouts
Taxus wallichiana var. mairei	2.1	1.6	1.3
Taxus wallichiana var. mairei	3.5	3.6	1.4

## Sheet: Raw data of yews in DB forest
Three transects of raw data of Chinese yews in deciduous broadleaved forest
Transect-quadrat	Species	Diameter at breast height（cm）	Height（m）	First branch height（m）	Type of sprouting	Total yews in the sample plot
1—1	Taxus wallichiana var. mairei	3.6	2.8	1.6		12
	Taxus wallichiana var. mairei	5.8	4.7	1.9
	Taxus wallichiana var. mairei	3.7	4.4	2
	Taxus wallichiana var. mairei	4.8	4.5	1.2
	Taxus wallichiana var. mairei	6.7	6.2	1.8
	Taxus wallichiana var. mairei	3.4	4.1	1.1
	Taxus wallichiana var. mairei	0.9	1.7	1.3
	Taxus wallichiana var. mairei	2.8	2.9	1.3
	Taxus wallichiana var. mairei	5.4	4.7	3.4
	Taxus wallichiana var. mairei	2.6	2.8	0.6
	Taxus wallichiana var. mairei	4.6	3.6	2.1
	Taxus wallichiana var. mairei	5.4	4.4	2.7
1—2	Taxus wallichiana var. mairei	2	1.7	0.38		9
	Taxus wallichiana var. mairei	3.5	3.6	1.2
	Taxus wallichiana var. mairei	9	4	3
	Sprouting1	2	1.3	0.83	Collar sprouts
	Taxus wallichiana var. mairei	2.3	2.32	1.14
	Taxus wallichiana var. mairei	1.3	1.82	0.9
	Taxus wallichiana var. mairei	2.9	3.1	1.6
	Taxus wallichiana var. mairei	5.6	4.59	2
	Taxus wallichiana var. mairei	7.51592	5.55	2.7
1—3	Taxus wallichiana var. mairei	3.8	3	0.65		34
	Taxus wallichiana var. mairei	9	4.2	2.8
	Taxus wallichiana var. mairei	1.5	1.4	0.9
	Taxus wallichiana var. mairei	1.1	1.7	1.4
	Taxus wallichiana var. mairei	1.2	1.4	1.16
	Taxus wallichiana var. mairei	3	2.6	1.15
	Taxus wallichiana var. mairei	4	4.3	1.7
	Taxus wallichiana var. mairei	5.8	4.3	1.7
	Sprouting1	0.6	1	0.5	Collar sprouts
	Taxus wallichiana var. mairei	5	4.1	2.5
	Taxus wallichiana var. mairei	2	2	0.9
	Taxus wallichiana var. mairei	3.2	3	1.1
	Taxus wallichiana var. mairei	6	5.2	2.2
	Taxus wallichiana var. mairei	4.5	4.31	0.9
	Taxus wallichiana var. mairei	2.5	3.78	0.91
	Taxus wallichiana var. mairei	6.6	4.8	1.37
	Sprouting1	1.7	0.97	0.33	Opportunistic sprouts
	Taxus wallichiana var. mairei	7.6	5.28	1.75
	Taxus wallichiana var. mairei	2	1.51	0.43
	Taxus wallichiana var. mairei	2.6	1.76	0.93
	Taxus wallichiana var. mairei	1.4	1.65	1.25
	Taxus wallichiana var. mairei	1.1	1.37	0.07
	Taxus wallichiana var. mairei	1.6	2.07	0.56
	Taxus wallichiana var. mairei	2	1.7	1.2
	Taxus wallichiana var. mairei	8.1	4.87	0.64
	Taxus wallichiana var. mairei	0.7	1.26	0.7
	Taxus wallichiana var. mairei	8.5	6.6	3.14
	Taxus wallichiana var. mairei	2	2.15	0.58
	Taxus wallichiana var. mairei	7.83439	6.2	2.52
	Taxus wallichiana var. mairei	4.1	2.27	0.86
	Taxus wallichiana var. mairei	6.49682	5.3	1.5
	Taxus wallichiana var. mairei	4.61783	2.82	0.93
	Taxus wallichiana var. mairei	6.36943	4.07	1.1
	Taxus wallichiana var. mairei	6.6879	5.35	0.92
1—4	Taxus wallichiana var. mairei	4	3.2	1.7		30
	Taxus wallichiana var. mairei	3.4	2.3	1.3
	Taxus wallichiana var. mairei	3	2.5	0.13
	Taxus wallichiana var. mairei	5	3.5	1.9
	Taxus wallichiana var. mairei	4.8	3.4	2
	Taxus wallichiana var. mairei	6	5	1.8
	Taxus wallichiana var. mairei	6.5	4.6	1.3
	Sprouting1	5	2.8	1.4	Crown sprouts
	Taxus wallichiana var. mairei	6.5	4.2	1.9
	Sprouting1	3.6	3.4	3	Collar sprouts1
	Sprouting2	7	5	3.2	Collar sprouts2
	Taxus wallichiana var. mairei	3	3.6	1.8
	Taxus wallichiana var. mairei	7	4.8	1.4
	Taxus wallichiana var. mairei	4	3.6	1.2
	Taxus wallichiana var. mairei	3.6	3.5	1.1
	Sprouting1	3	2.8	1.7	Collar sprouts
	Taxus wallichiana var. mairei	8.43949	6	2.5
	Taxus wallichiana var. mairei	4.84076	1.9	0.2
	Taxus wallichiana var. mairei	7.32484	5.62	2.62
	Taxus wallichiana var. mairei	6.78344	5.2	1.23
	Taxus wallichiana var. mairei	3.9172	3.5	1.02
	Taxus wallichiana var. mairei	4.96815	4.7	1.4
	Sprouting1	0.9	1.21	0.18	Collar sprouts
	Taxus wallichiana var. mairei	8.28025	6.3	0.87
	Taxus wallichiana var. mairei	4.77707	4.66	0.82
	Sprouting1	1.1	0.93	0.4	Collar sprouts
	Taxus wallichiana var. mairei	3.9172	3.38	0.8
	Taxus wallichiana var. mairei	7.64331	5.7	1.43
	Taxus wallichiana var. mairei	4.96815	3.2	1.53
	Taxus wallichiana var. mairei	1.2	0.73	0.07
1—5	Taxus wallichiana var. mairei	1.5	1.7	1.3		38
	Sprouting1	3	3.1	2	Collar sprouts1
	Sprouting2	7.32484	4.8	1.7	Collar sprouts2
	Taxus wallichiana var. mairei	5.41401	4	2.3
	Taxus wallichiana var. mairei	4	2	24
	Taxus wallichiana var. mairei	3	1.4	30
	Taxus wallichiana var. mairei	7.51592	5.2	1.02
	Taxus wallichiana var. mairei	7.73885	5.2	0.8
	Taxus wallichiana var. mairei	8.28025	5.7	0.6
	Taxus wallichiana var. mairei	5.25478	4.47	1.14
	Taxus wallichiana var. mairei	7.64331	3.8	0.83
	Taxus wallichiana var. mairei	4.14013	3.9	0.57
	Taxus wallichiana var. mairei	5.09554	4.26	2.1
	Taxus wallichiana var. mairei	5.73248	4.9	0.5
	Taxus wallichiana var. mairei	3.18471	3.82	0.81
	Taxus wallichiana var. mairei	2.3	2.62	0.62
	Taxus wallichiana var. mairei	6.05096	5.27	1.7
	Taxus wallichiana var. mairei	1.1	1.4	0.17
	Taxus wallichiana var. mairei	3.66242	4.43	2.7
	Taxus wallichiana var. mairei	6.05096	5.6	1.87
	Taxus wallichiana var. mairei	8.59873	5.22	1.1
	Taxus wallichiana var. mairei	3.82166	3.2	2.1
	Taxus wallichiana var. mairei	4.4586	3.9	1.6
	Taxus wallichiana var. mairei	0.09	0.76	0.2
	Taxus wallichiana var. mairei	1	1.1	0.7
	Taxus wallichiana var. mairei	4.14013	2.93	0.46
	Taxus wallichiana var. mairei	3	3.35	0.67
	Taxus wallichiana var. mairei	0.1	0.14	0.08
	Taxus wallichiana var. mairei	1.5	1.95	0.56
	Taxus wallichiana var. mairei	2.1	2.6	0.7
	Taxus wallichiana var. mairei	2.1	3.17	0.63
	Taxus wallichiana var. mairei	1.2	1.8	0.3
	Taxus wallichiana var. mairei	8.59873	5.04	1.24
	Sprouting1	3.3	3.68	1.23	Collar sprouts
	Taxus wallichiana var. mairei	1.4	1.7	0.7
	Taxus wallichiana var. mairei	8.05732	4.1	1.1
	Sprouting1	2.5	4	0.9	Root sprouts 1
	Sprouting2	2	2.9	1.15	Root sprouts 2
1—6	Taxus wallichiana var. mairei	2	2	1.7		52
	Taxus wallichiana var. mairei	3	3	2.1
	Taxus wallichiana var. mairei	5.41401	4.5	0.8
	Sprouting1	1	0.7	0.1	Crown sprouts
	Taxus wallichiana var. mairei	2.5	2.8	1.8
	Sprouting1	1.6	2	1.5	Collar sprouts1
	Sprouting2	0.8	0.75	0.15	Collar sprouts2
	Taxus wallichiana var. mairei	6	3.4	2.5
	Taxus wallichiana var. mairei	2	2.2	1.5
	Taxus wallichiana var. mairei	7.32484	4.6	1.8
	Taxus wallichiana var. mairei	6.36943	4.5	3
	Sprouting1	1.6	2.3	2.1	Collar sprouts
	Taxus wallichiana var. mairei	2.5	3.5	2.5
	Taxus wallichiana var. mairei	6.6879	5.3	3.5
	Taxus wallichiana var. mairei	6.36943	4	2
	Sprouting1	3.2	1.3	1.1	Collar sprouts 1
	Sprouting2	0.5	0.8	0.3	Collar sprouts 2
	Taxus wallichiana var. mairei	3	3	2.1
	Taxus wallichiana var. mairei	5.73248	4.1	2.5
	Taxus wallichiana var. mairei	7.64331	5.1	2.2
	Taxus wallichiana var. mairei	2.8	1	0.36
	Sprouting1	2.5	1.9	0.2	Collar sprouts1
	Sprouting2	2	1.9	1.5	Collar sprouts2
	Taxus wallichiana var. mairei	4	3.5	0.5
	Taxus wallichiana var. mairei	5.41401	4.5	2.4
	Taxus wallichiana var. mairei	4	3	1.3
	Taxus wallichiana var. mairei	10.5096	5.2	1.92
	Taxus wallichiana var. mairei	0.1	0.11	0.05
	Taxus wallichiana var. mairei	0.1	0.09	0.03
	Taxus wallichiana var. mairei	0.15	0.22	0.01
	Taxus wallichiana var. mairei	0.1	0.12	0.01
	Taxus wallichiana var. mairei	0.1	0.12	0.01
	Taxus wallichiana var. mairei	2.7	2.62	0.4
	Taxus wallichiana var. mairei	3.1	3.35	1.33
	Taxus wallichiana var. mairei	2.1	2.52	1.6
	Taxus wallichiana var. mairei	1.3	1.9	1.2
	Taxus wallichiana var. mairei	3.2	3.27	0.6
	Taxus wallichiana var. mairei	5.09554	3.95	1.07
	Taxus wallichiana var. mairei	3.1	2.9	1
	Taxus wallichiana var. mairei	3.4	3.85	1.62
	Taxus wallichiana var. mairei	7.26115	4.2	1
	Taxus wallichiana var. mairei	2.1	3.1	0.6
	Taxus wallichiana var. mairei	2.8	3.2	1.75
	Taxus wallichiana var. mairei	17.9	4.6	1.85
	Sprouting1	0.2	0.5	0.25	Collar sprouts
	Taxus wallichiana var. mairei	1.9	2.1	0.65
	Taxus wallichiana var. mairei	1.3	2.2	0.35
	Taxus wallichiana var. mairei	3.1	4	1.45
	Taxus wallichiana var. mairei	6.71975	6.4	2.9
	Taxus wallichiana var. mairei	9.55414	7.9	2.66
	Taxus wallichiana var. mairei	3	3.8	2
	Taxus wallichiana var. mairei	6.6879	4.7	1.3
1—7	Taxus wallichiana var. mairei	5	3.8	2.1		30
	Taxus wallichiana var. mairei	7.80255	5	0.7
	Taxus wallichiana var. mairei	4.4	3.7	1.9
	Taxus wallichiana var. mairei	5	3.8	1.9
	Taxus wallichiana var. mairei	5.09554	4.7	2.9
	Taxus wallichiana var. mairei	8.28025	6.2	1.9
	Taxus wallichiana var. mairei	0.1	0.11	0.05
	Taxus wallichiana var. mairei	0.1	0.13	0.05
	Taxus wallichiana var. mairei	1.1	0.97	0.2
	Taxus wallichiana var. mairei	0.1	0.13	0.06
	Taxus wallichiana var. mairei	5.09554	4.9	4
	Taxus wallichiana var. mairei	4.4586	3.3	1.3
	Taxus wallichiana var. mairei	9.04459	5.2	2.87
	Taxus wallichiana var. mairei	12.7389	8.7	2.94
	Sprouting1	3.82166	2.78	2	Collar sprouts
	Taxus wallichiana var. mairei	8.50318	7.6	2.9
	Taxus wallichiana var. mairei	9.55414	5.7	1.82
	Taxus wallichiana var. mairei	9.04459	5.6	2.26
	Taxus wallichiana var. mairei	3.3	3.2	1.5
	Taxus wallichiana var. mairei	2.7	2.7	1.8
	Taxus wallichiana var. mairei	6.05096	4.1	2.3
	Taxus wallichiana var. mairei	1.7	2.25	0.83
	Sprouting1	1	1.5	0.8	Collar sprouts
	Taxus wallichiana var. mairei	2	1.6	0.37
	Taxus wallichiana var. mairei	5.47771	4.15	2.15
	Taxus wallichiana var. mairei	5.35032	5.21	2.8
	Taxus wallichiana var. mairei	4.6	4.55	1.35
	Taxus wallichiana var. mairei	3.7	3.3	0.22
	Taxus wallichiana var. mairei	1	0.72	0.28
	Taxus wallichiana var. mairei	3.5	3.3	1.5
1—8	Taxus wallichiana var. mairei	0.1	0.18	0.08		7
	Taxus wallichiana var. mairei	0.1	0.14	0.06
	Taxus wallichiana var. mairei	5.73248	4.2	1.33
	Taxus wallichiana var. mairei	8.40764	5.6	3.18
	Taxus wallichiana var. mairei	4.6	2.24	0.92
	Sprouting1	2.3	2.5	0.6	Collar sprouts
	Taxus wallichiana var. mairei	1.8	1.8	0.5
1—9	Taxus wallichiana var. mairei	8	5.34	0.75		6
	Taxus wallichiana var. mairei	0.1	0.6	0.3	Collar sprouts
	Taxus wallichiana var. mairei	3.7	3.2	0.5
	Taxus wallichiana var. mairei	7.00637	5.4	2.4
	Sprouting1	1	1.2	0.3	Collar sprouts
	Taxus wallichiana var. mairei	5.76433	5.46	2.5
1—10	Taxus wallichiana var. mairei	0.9	1.12	0.34		6
	Taxus wallichiana var. mairei	2.9	1.77	0.43
	Taxus wallichiana var. mairei	0.9	0.98	0.2
	Taxus wallichiana var. mairei	4.3	2.9	0.42
	Taxus wallichiana var. mairei	2.5	3.2	1.7
	Sprouting1	1.1	1.9	0.5	Collar sprouts
1—11	Taxus wallichiana var. mairei	8.28025	6	4		8
	Sprouting1	4	4	3	Collar sprouts
	Taxus wallichiana var. mairei	5.2	2.3	1.5
	Sprouting1	3.3	0.95	0.4	Collar sprouts
	Taxus wallichiana var. mairei	7.96178	5.2	1.2
	Taxus wallichiana var. mairei	6.36943	2.4	2
	Taxus wallichiana var. mairei	4.5	4	2.5
	Taxus wallichiana var. mairei	11.1465	6.2	2.2
1—12	Taxus wallichiana var. mairei	7.2	6.2	2.7		7
	Taxus wallichiana var. mairei	6.3	4.2	0.7
	Taxus wallichiana var. mairei	0.3	0.38	0.03
	Sprouting1	0.2	0.34	0.01	Collar sprouts
	Sprouting2	0.2	0.3	0.01	Collar sprouts
	Taxus wallichiana var. mairei	7.00637	6.5	2.75
	Taxus wallichiana var. mairei	2.6	2.25	0.96
1—13	Taxus wallichiana var. mairei	3.6	2.6	1.3		11
	Taxus wallichiana var. mairei	3.9	2	1.1
	Taxus wallichiana var. mairei	0.18	1.3	0.8
	Taxus wallichiana var. mairei	4.3	3.6	1.6
	Taxus wallichiana var. mairei	1.4	2.25	0.65
	Taxus wallichiana var. mairei	2.28	5.58	1.8
	Taxus wallichiana var. mairei	2.6	2.97	1
	Taxus wallichiana var. mairei	3	3.55	2.4
	Taxus wallichiana var. mairei	2.1	1.1	0.4
	Taxus wallichiana var. mairei	0.4	0.6	0.25
	Taxus wallichiana var. mairei	2.8	3	1
1—14	Taxus wallichiana var. mairei	3.8	3.4	2.3		2
	Taxus wallichiana var. mairei	4.5	4.7	2.6
1—15	Taxus wallichiana var. mairei	2.3	2.5	1.8		14
	Taxus wallichiana var. mairei	5.8	3.6	2.5
	Sprouting1	1.4	1	0.6	Collar sprouts
	Sprouting2	0.4	0.45	0.25	Collar sprouts
	Taxus wallichiana var. mairei	3.3	2	0.6
	Sprouting1	1.5	0.75	0.25	Collar sprouts
	Taxus wallichiana var. mairei	6.6879	4.2	1.25
	Taxus wallichiana var. mairei	2	1.5	1
	Sprouting1	1.5	1.2	0.9
	Sprouting2	1	1.05	0.9
	Taxus wallichiana var. mairei	3.7	3.2	2
	Taxus wallichiana var. mairei	0.5	0.62	0.2
	Taxus wallichiana var. mairei	0.4	0.4	0.12
	Taxus wallichiana var. mairei	2.8	3.8	0.95
1—16	Taxus wallichiana var. mairei	1.2	1.2	0.4		2
	Taxus wallichiana var. mairei	3	2.7	0.9
1—17	Taxus wallichiana var. mairei	9.87261	6.1	1.84		6
	Sprouting1	0.8	0.97	0.45	Collar sprouts
	Taxus wallichiana var. mairei	3.5	2.6	1.5
	Sprouting1	1.2	2.1	0.8
	Taxus wallichiana var. mairei	2.8	2.1	1.2
	Sprouting1	1.6	1.8	1.1
1—18	Taxus wallichiana var. mairei	5.89172	6.3	2.7		20
	Sprouting1	2.4	2.7	1.8	Collar sprouts
	Sprouting2	1.1	1.3	0.4	Collar sprouts
	Taxus wallichiana var. mairei	7.00637	5.8	1.5
	Sprouting1	1.1	1.54	0.3	Root sprouts 1
	Sprouting2	0.8	1.6	0.4	Root sprouts 2
	Taxus wallichiana var. mairei	17.6	3.8	1.2
	Sprouting1	0.8	0.67	0.2	Collar sprouts
	Taxus wallichiana var. mairei	9.68153	6.4	1.9
	Taxus wallichiana var. mairei	9.23567	6.2	2.7
	Taxus wallichiana var. mairei	5.57325	3.6	1.6
	Taxus wallichiana var. mairei	5.31847	3.5	2.1
	Taxus wallichiana var. mairei	3.2	4.5	2.2
	Taxus wallichiana var. mairei	7.32484	5.1	3.1
	Taxus wallichiana var. mairei	5.25478	3.8	1.7
	Sprouting1	3.2	1.9	0.6	Root sprouts
	Taxus wallichiana var. mairei	4.93631	4.2	1.2
	Sprouting1	2.6	1.9	0.8	Collar sprouts
	Taxus wallichiana var. mairei	7.48408	4.6	3.5
	Taxus wallichiana var. mairei	3.2	3	2
1—19	Taxus wallichiana var. mairei	7.96178	6	3.8		17
	Taxus wallichiana var. mairei	8.8535	4.6	1.8
	Sprouting1	0.8	0.57	0.25	Collar sprouts
	Sprouting2	1	0.8	0.4	Collar sprouts
	Taxus wallichiana var. mairei	4.4586	3.7	1.6
	Sprouting1	0.4	0.5	0.2	Crown sprouts 1
	Sprouting2	0.4	0.6	0.3	Crown sprouts 2
	Taxus wallichiana var. mairei	7.32484	5.2	1.5
	Taxus wallichiana var. mairei	2	2.3	0.4
	Taxus wallichiana var. mairei	3.82166	3.5	1.8
	Taxus wallichiana var. mairei	3.18471	2.2	0.8
	Taxus wallichiana var. mairei	1	1.5	0.55
	Taxus wallichiana var. mairei	2	2.5	1.3
	Taxus wallichiana var. mairei	4.3	3.9	2.3
	Taxus wallichiana var. mairei	2.3	2.4	1.6
	Taxus wallichiana var. mairei	1.8	2.1	1.4
	Taxus wallichiana var. mairei	2.3	3.4	1.8
1—20	Taxus wallichiana var. mairei	2.1	1.8	1.3		5
	Taxus wallichiana var. mairei	3.4	2.8	1.7
	Taxus wallichiana var. mairei	1.2	2	1
	Taxus wallichiana var. mairei	1	1.5	0.21
	Taxus wallichiana var. mairei	1.5	2.4	0.75
1—21	Taxus wallichiana var. mairei	5.3	3.8	1.5		1
1—22	Taxus wallichiana var. mairei	5.3	5.6	1.2		1
1—23	Taxus wallichiana var. mairei	5.89172	3.5	1.2		4
	Taxus wallichiana var. mairei	11.3376	5.12	1.95
	Taxus wallichiana var. mairei	8.12102	5.8	1.49
	Taxus wallichiana var. mairei	8.40764	6.2	3.2
1—24	Taxus wallichiana var. mairei	12.1019	6.1	1.85		3
	Taxus wallichiana var. mairei	9.87261	5.2	1.6
	Taxus wallichiana var. mairei	5.31847	4.2	1.6
1—25	Taxus wallichiana var. mairei	2.7	3.4	1.77		17
	Taxus wallichiana var. mairei	4.2	2.24	0.7
	Sprouting1	2	1.9	0.8	Collar sprouts
	Taxus wallichiana var. mairei	4.2	3.1	1.3
	Sprouting1	4.3	3.3	0.9	Collar sprouts
	Taxus wallichiana var. mairei	5.2	4.2	2.3
	Sprouting1	0.4	0.74	0.3	Collar sprouts
	Taxus wallichiana var. mairei	3.9	3.7	1.4
	Sprouting1	1.3	1.7	0.4	Collar sprouts
	Taxus wallichiana var. mairei	4.2	4.3	2.6
	Taxus wallichiana var. mairei	8.43949	5.8	1.26
	Sprouting1	1.4	0.9	0.3	Collar sprouts
	Taxus wallichiana var. mairei	4.7	3.9	1.75
	Taxus wallichiana var. mairei	1.1	1.5	1.2
	Taxus wallichiana var. mairei	5.6	4.4	2.3
	Taxus wallichiana var. mairei	9.87261	4.3	3.1
	Taxus wallichiana var. mairei	4.3	3.9	2.7
2—1	Taxus wallichiana var. mairei	2.1	2.3	0.6		1
2—2	Taxus wallichiana var. mairei	5.41401	4.1	2.8		11
	Taxus wallichiana var. mairei	3.5	3	1.2
	Taxus wallichiana var. mairei	7.32484	4	0.55
	Taxus wallichiana var. mairei	0.6	4	2.4
	Taxus wallichiana var. mairei	3.5	2.4	1.2
	Taxus wallichiana var. mairei	3.7	2.3	0.55
	Taxus wallichiana var. mairei	2.2	2	1.8
	Taxus wallichiana var. mairei	2.2	2.85	1.3
	Sprouting1	0.9	1.8	0.3	Collar sprouts
	Taxus wallichiana var. mairei	3	3.13	1.7
	Sprouting1	0.3	0.6	0.2	Collar sprouts
2—3	Taxus wallichiana var. mairei	3.5	4	2.33		14
	Taxus wallichiana var. mairei	3.4	4	1.1
	Taxus wallichiana var. mairei	2.1	2.85	2.1
	Taxus wallichiana var. mairei	3.6	4	0.8
	Sprouting1	1	0.4	1.4	Collar sprouts
	Taxus wallichiana var. mairei	5.3	5.3	2.3
	Taxus wallichiana var. mairei	3.1	3.2	0.96
	Taxus wallichiana var. mairei	1.1	1.2	0.6
	Sprouting1	2.1	3.3	1.18	Collar sprouts
	Taxus wallichiana var. mairei	7.00637	5.3	2.7
	Taxus wallichiana var. mairei	0.4	0.7	0.2
	Taxus wallichiana var. mairei	2.1	2.9	0.2
	Taxus wallichiana var. mairei	2.5	3.1	1
	Taxus wallichiana var. mairei	1.5	2.15	0.6
2—4	Taxus wallichiana var. mairei	3	3.2	1.7		19
	Taxus wallichiana var. mairei	4.2	3.5	1.9
	Taxus wallichiana var. mairei	3	2.8	1.15
	Sprouting1	2.2	1.3	0.2	Root sprouts 1
	Sprouting2	1	0.5	0.1	Root sprouts 2
	Taxus wallichiana var. mairei	0.6	1	0.8
	Taxus wallichiana var. mairei	3.5	2.2	1
	Taxus wallichiana var. mairei	6.6879	5.3	3.5
	Sprouting1	1.2	1.1	0.12	Root sprouts
	Taxus wallichiana var. mairei	3.2	3.4	2.5
	Sprouting1	2.6	2.6	2	Root sprouts
	Taxus wallichiana var. mairei	4	2.8	1.05
	Taxus wallichiana var. mairei	2.7	2.5	1.9
	Taxus wallichiana var. mairei	2.6	3.2	1.3
	Sprouting1	0.8	1	0.3	Collar sprouts
	Taxus wallichiana var. mairei	3.6	3.6	2.06
	Taxus wallichiana var. mairei	3.2	2.4	1.12
	Taxus wallichiana var. mairei	5.1	5	1.5
	Sprouting1	3	3.16	1.7	Root sprouts
2—5	Taxus wallichiana var. mairei	2	2.7	1.5		6
	Taxus wallichiana var. mairei	4.6	3.8	1.2
	Taxus wallichiana var. mairei	2.1	2.6	0.8
	Taxus wallichiana var. mairei	4	4.1	2.1
	Taxus wallichiana var. mairei	7.13376	4.2	1.15
	Sprouting1	2.3	3.2	1.24	Root sprouts
2—6	Taxus wallichiana var. mairei	3	2.8	1.9		4
	Taxus wallichiana var. mairei	3.5	3.1	1.9
	Sprouting1	1.6	0.93	2.18	Root sprouts
	Taxus wallichiana var. mairei	2	2.1	0.5
2—7	Taxus wallichiana var. mairei	9.3949	6.3	1.2		7
	Sprouting1	3	1.45	0.15	Collar sprouts
	Taxus wallichiana var. mairei	6.6879	5.7	2.1
	Taxus wallichiana var. mairei	3.1	3.8	1.6
	Sprouting1	2.5	3.35	1	Collar sprouts
	Sprouting2	1.1	2.6	1.2	Collar sprouts
	Taxus wallichiana var. mairei	3	3	1.7
2—8	Taxus wallichiana var. mairei	4.1	3.9	2.55		3
	Taxus wallichiana var. mairei	1	1.8	0.7
	Sprouting1	1	0.9	0.2	Root sprouts
2—9	Taxus wallichiana var. mairei	3.8	2.8	1.1		9
	Sprouting1	2	1.1	0.3	Collar sprouts
	Taxus wallichiana var. mairei	9.23567	6.2	2.5
	Taxus wallichiana var. mairei	5.2	2.4	1.5
	Taxus wallichiana var. mairei	7.00637	4.5	0.75
	Taxus wallichiana var. mairei	2.1	2.5	1.1
	Taxus wallichiana var. mairei	0.8	1.3	0.8
	Taxus wallichiana var. mairei	0.8	1.45	1
	Taxus wallichiana var. mairei	4.5	4.6	2
2—10	Taxus wallichiana var. mairei	5.6	5.1	2.7		1
2—11	None					0
2—12	Taxus wallichiana var. mairei	1.2	1.1	0.13		10
	Taxus wallichiana var. mairei	0.3	0.55	0.2
	Taxus wallichiana var. mairei	1.1	1.9	0.3
	Taxus wallichiana var. mairei	3.5	3.2	1.3
	Taxus wallichiana var. mairei	4.6	4.2	0.7
	Sprouting1	0.3	0.7	0.3	Collar sprouts
	Taxus wallichiana var. mairei	3.9	3	1.9
	Sprouting1	2.7	2	1.1	Collar sprouts
	Sprouting2	1.6	1.9	0.6	Collar sprouts
	Sprouting3	1	1.1	0.5	Collar sprouts
2—13	Taxus wallichiana var. mairei	3.6	4.4	2.8		1
2—14	Taxus wallichiana var. mairei	3.8	3.45	2		9
	Taxus wallichiana var. mairei	4	3.25	1.2
	Taxus wallichiana var. mairei	3.8	4.3	3.8
	Sprouting1	0.3	0.5	0.2	Collar sprouts
	Taxus wallichiana var. mairei	7.00637	5.3	3.7
	Taxus wallichiana var. mairei	1.6	1.6	1.2
	Taxus wallichiana var. mairei	9.55414	5.8	0.95
	Taxus wallichiana var. mairei	4.5	4	3.1
	Taxus wallichiana var. mairei	2.54777	4.6	1.7
2—15	Taxus wallichiana var. mairei	4.6	3.8	1.6		8
	Taxus wallichiana var. mairei	3.1	2.4	0.9
	Taxus wallichiana var. mairei	1.6	1.8	0.6
	Taxus wallichiana var. mairei	3.4	3.8	1.6
	Sprouting1	1.9	2.2	1.1	Collar sprouts
	Taxus wallichiana var. mairei	3.5	3.6	1.5
	Taxus wallichiana var. mairei	3.6	3.4	1.2
	Taxus wallichiana var. mairei	3.2	2.7	1.5
2—16	Taxus wallichiana var. mairei	7.16561	5.6	3.9		6
	Taxus wallichiana var. mairei	7.10191	6.8	3
	Sprouting1	5.89172	4.2	3
	Taxus wallichiana var. mairei	9.55414	4.6	0.9
	Sprouting1	4	2.4	0.35
	Taxus wallichiana var. mairei	4	3	0.3
2—17	Taxus wallichiana var. mairei	4.5	2.4	0.3		3
	Taxus wallichiana var. mairei	5.73248	4.5	3.8
	Taxus wallichiana var. mairei	7.00637	6	0.9
2—18	None					0
2—19	None					0
2—20	None					0
2—21	None					0
2—22	None					0
2—23	None					0
2—24	None					0
2—25	None					0
3—1	Taxus wallichiana var. mairei	3.8	3.1	1.6		1
3—2	None					0
3—3	None					0
3—4	Taxus wallichiana var. mairei	2.1	2.7	1.73		1
3—5	None					0
3—6	Taxus wallichiana var. mairei	4.1	3.64	2.1		2
	Taxus wallichiana var. mairei	2.4	1.9	0.48
3—7	None					0
3—8	None					0
3—9	Taxus wallichiana var. mairei	1.4	1.8	0.68		4
	Taxus wallichiana var. mairei	7.2293	5.2	0.8
	Taxus wallichiana var. mairei	2.5	3	1.32
	Taxus wallichiana var. mairei	2.7	3.4	0.92
3—10	None					0
3—11	None					0
3—12	None					0
3—13	None					0
3—14	Taxus wallichiana var. mairei	7.00637	5.4	3.4		9
	Taxus wallichiana var. mairei	7.32484	4.4	3.1
	Taxus wallichiana var. mairei	1.2	0.95	0.28
	Taxus wallichiana var. mairei	4.3	3.9	1.9
	Taxus wallichiana var. mairei	3.8	3.2	1.7
	Taxus wallichiana var. mairei	6.11465	4.8	3
	Taxus wallichiana var. mairei	5.89172	3.4	1.95
	Sprouting1	3	2.2	0.8	Collar sprouts
	Taxus wallichiana var. mairei	8.05732	6.1	3.9
3—15	Taxus wallichiana var. mairei	8.12102	5.4	1.9		1
3—16	Taxus wallichiana var. mairei	3.2	3.4	2.5		5
	Taxus wallichiana var. mairei	3.2	3.7	2.8
	Sprouting1	2.9	3.6	2	Collar sprouts
	Taxus wallichiana var. mairei	2.5	2.8	1.6
	Taxus wallichiana var. mairei	7.48408	5.6	2.4
3—17	Taxus wallichiana var. mairei	5.5414	4.5	2.3		1
3—18	None					0
3—19	None					0
3—20	None					0
3—21	None					0
3—22	None					0
3—23	None					0
3—24	None					0
3—25	None					0
Chinese yews outside the three transects in deciduous broadleaved forest
Species	Diameter at breast height（cm）	Height（m）	First branch height（m）	Type of sprouting
Taxus wallichiana var. mairei	4.61783	4	2.5
Taxus wallichiana var. mairei	3.8	2.95	1.6
Sprouting1	0.3	0.6	0.3	Collar sprouts1
Sprouting2	0.2	0.4	0.2	Collar sprouts2
Sprouting3	0.1	0.17	0.01	Collar sprouts3
Taxus wallichiana var. mairei	5.6051	4.1	2.1
Taxus wallichiana var. mairei	4	4	1.8
Sprouting1	2.2	2.5	1	Collar sprouts1
Sprouting2	2.8	3	1.2	Collar sprouts2
Taxus wallichiana var. mairei	3.5	3.5	1.6
Taxus wallichiana var. mairei	8.50318	5.6	2
Sprouting1	4.2	3.3	2	Collar sprouts1
Sprouting2	1.5	1.1	0.6	Collar sprouts2
Taxus wallichiana var. mairei	4.61783	5.8	2.9
Taxus wallichiana var. mairei	5.25478	2.9	1.9
Taxus wallichiana var. mairei	2.2	2.3	0.95
Taxus wallichiana var. mairei	4	3.5	2.1
Taxus wallichiana var. mairei	3.3	2.7	1.5
Taxus wallichiana var. mairei	5.09554	4	2
Sprouting1	2	2	1.1	Collar sprouts
Taxus wallichiana var. mairei	7.07006	5.5	1.2
Taxus wallichiana var. mairei	6.05096	4.7	2.9
Taxus wallichiana var. mairei	3.2	4.2	1.4
Sprouting1	0.4	0.72	0.35	Collar sprouts
Taxus wallichiana var. mairei	4.2	4.4	1.6
Taxus wallichiana var. mairei	5.7	5.3	0.6
Taxus wallichiana var. mairei	3.1	3.1	1.3
Sprouting1	2.3	2.7	1.8	Collar sprouts
